# Supplementary material for: Knowledge and practice of patients with diabetes mellitus in Lebanon: a cross-sectional study
Source: Springer Nature journal article supplement (doi:10.1186/s12889-018-5416-7), 2018-04-20
Supplement: MOESM1 [file 15709766]

**Knowledge and Practice of Diabetes Mellitus in  
Lebanon: A Cross-Sectional Study**

**GENERAL INFORMATION**

G1. Age (years): \_\_\_\_\_

G2. Weight (Kg): \_\_\_\_\_

G3. Gender: \_\_\_\_\_

- a. Male
- b. Female

G4. Education

- a. Primary/Intermediate
- b. High school
- c. University

G5. Smoking

- a. Cigarettes (#/day: \_\_\_\_\_)
- b. Hubble bubble (#/day: \_\_\_\_\_)
- c. No

G6. Family history of diabetes

- a. Yes
- b. No

G7. Please indicate which chronic condition you have

(Check all that apply):

- a. Type 1 diabetes mellitus
- b. Type 2 diabetes mellitus
- c. High cholesterol
- d. High blood pressure
- e. Heart disease
- f. Lung disease

G8. Are you on Aspirin?

- a. Yes
- b. No

G9. Are you on lipid-lowering medications (statins, fibrates..)?

- a. Yes
- b. No

G10. Do you think diabetes mellitus is contagious?

- a. Yes
- b. No
- c. Don't know

**DIAGNOSIS AND MONITORING**

D1. How did you know you had diabetes?

- a. Coincidence/curiosity
- b. Physician check-up

D2. Do you have a machine to measure your blood sugar level?

- a. Yes
- b. No

D3. How often do you test your own blood glucose levels?  
(Please tick one box only)

- a. >4 times/day
- b. 2-3 times/day
- c. Once a day
- d. < 1time/day
- e. Never

D4. Do you know what is the normal fasting blood glucose level?

- a. Yes. Specify: \_\_\_\_\_
- b. No
- c. Don't know

D5. Do you know your HbA<sub>1c</sub> level?

- a. Yes. Specify: \_\_\_\_\_
- b. No
- c. Don't know

D6. Do you know normal HbA<sub>1c</sub> level

- a. Yes. Specify: \_\_\_\_\_
- b. No
- c. Don't know

D7. When were you first diagnosed? \_\_\_\_\_

D8. How often do you have a foot exam per year? \_\_\_\_\_

D9. How often do you have an eye exam per year? \_\_\_\_\_

## MANAGEMENT – NON-PHARMACOLOGICAL THERAPY

MP1. Do you follow a special diet for diabetes?

- a. Yes
- b. No

MP2. Do you know what food you need to avoid if you have diabetes mellitus?

- a. Yes. Specify. \_\_\_\_\_
- b. No
- c. Don't know

MP3. How much exercise are you doing to help manage your diabetes per week?

- a. <30 minutes
- b. 1- 3 hours
- c. > 3 hours
- d. I am not doing any exercise

## MANAGEMENT – PHARMACOLOGICAL THERAPY

MP1. How do you currently control your diabetes?  
(Please tick all that apply)

- a. Insulin
- b. Oral tablets
- c. Diet
- d. Physical activity
- e. Other. Specify: \_\_\_\_\_

MP2. Do you know the name of your medication (s)?

- a. Yes. Specify \_\_\_\_\_
- b. No

MP3. Do you know what side effects you may have from your medication (s)?

- a. Yes. Specify \_\_\_\_\_
- b. No

MP4. Are you on insulin?

- a. No
- b. Yes. Please tick below:
  - i. *Short acting:*
    - a. Actrapid®
    - b. Humalog®
    - c. Novorapid®
    - d. Humilin R®
  - ii. *Long acting:*
    - a. Levemir®
    - b. Lantus®
  - iii. *Intermediate acting:*
    - a. Humalog 25/75®
    - b. Humalog 50/50®
    - c. Mixtard®
    - d. Humilin N®
    - e. Humilin 70/30®
    - f. Novomix®

MP5. How many insulin shots/day? \_\_\_\_\_

MP6. Do you know how to self-administer insulin?

- a. Yes
- b. No

## COMPLICATIONS

C1. Have you ever had a hypoglycemic episode?

- a. Yes
- b. No

C2. Have you ever had a hyperglycemic episode?

- a. Yes
- b. No

C3. Do you respond to a low blood sugar by taking a sugary food or drink immediately?

- a. Yes
- b. No, please state what you do \_\_\_\_\_

C4. Have you ever seen an eye doctor?

- a. Yes
- b. No

C5. Did you have blurry vision or decreased visual acuity?

- a. Yes
- b. No

C6. Have you ever had protein in urine?

- a. Yes
- b. No

C7. Did you ever check your blood creatinine levels?

- a. Yes
- b. No

C8. Did you ever require dialysis/kidney transplant?

- a. Yes
- b. No

C9. Have you ever had any numbness or tingling or burning of fingers or toes?

- a. Yes
- b. No

C10. Have you ever had any loss of sensation to a body part or area?

- a. Yes
- b. No

C11. Have you ever had foot ulcers or foot deformities?

- a. Yes
- b. No
